# Supplementary material for: A Simple and Fast Procedure to Determine 3-Nitropropanoic Acid and 3-Nitropropanol in Freeze Dried Canadian Milkvetch (Astragalus canadensis)
Source: Toxins (Basel). 2017 Jun 29;9(7):204. doi: 10.3390/toxins9070204 (PMC5535151; doi:10.3390/toxins9070204)
Supplement: Supplementary file 1 [file toxins-09-00204-s001.pdf]

# Supplementary Materials: A Simple and Fast Procedure to Determine 3-Nitropropanoic Acid and 3-Nitropropanol in Freeze Dried Canadian MilkVetch (*Astragalus canadensis*)

Huaizhi Liu, Suqin Shao and Mike Schellenberg

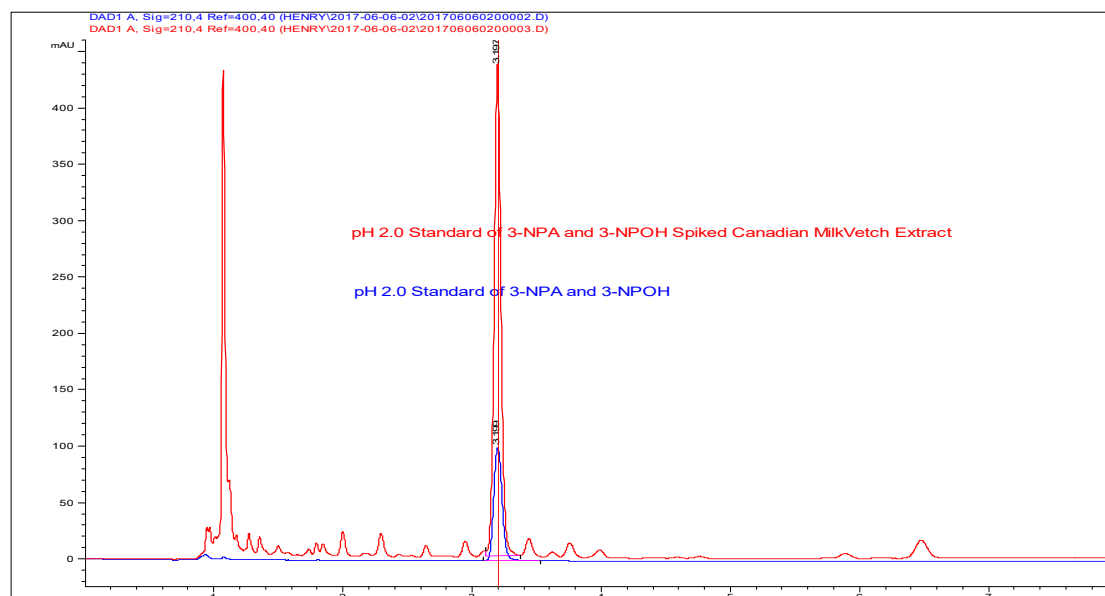

**Figure S1.** Overlaid HPLC chromatograms of mixture standards of 3-NPA and 3-NPOH at 10 ppm in water and spiked Canadian milkvetch sample, with pH 2.0 12.5 mM ammonium phosphate buffer as mobile phase on a Phenomenex Kinetex 2.6  $\mu$  F5 100Å column. All standard solution and Canadian milkvetch samples were recon at the corresponding pH mobile phase. 3-NPA and 3-NPOH was not separated.

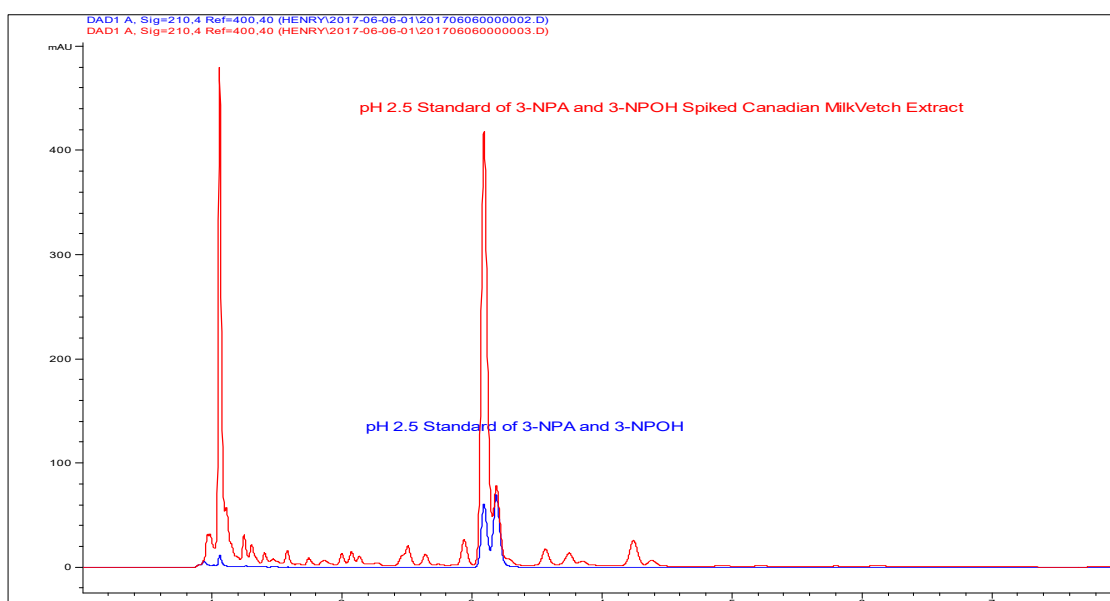

**Figure S2.** Overlaid HPLC chromatograms of mixture standards of 3-NPA and 3-NPOH at 10 ppm in water and spiked Canadian milkvetch sample, with pH 2.5 12.5 mM ammonium phosphate buffer as mobile phase on a Phenomenex Kinetex 2.6  $\mu$  F5 100Å column. All standard solution and Canadian milkvetch samples were recon at the corresponding pH mobile phase. 3-NPA and 3-NPOH was not baseline separated.

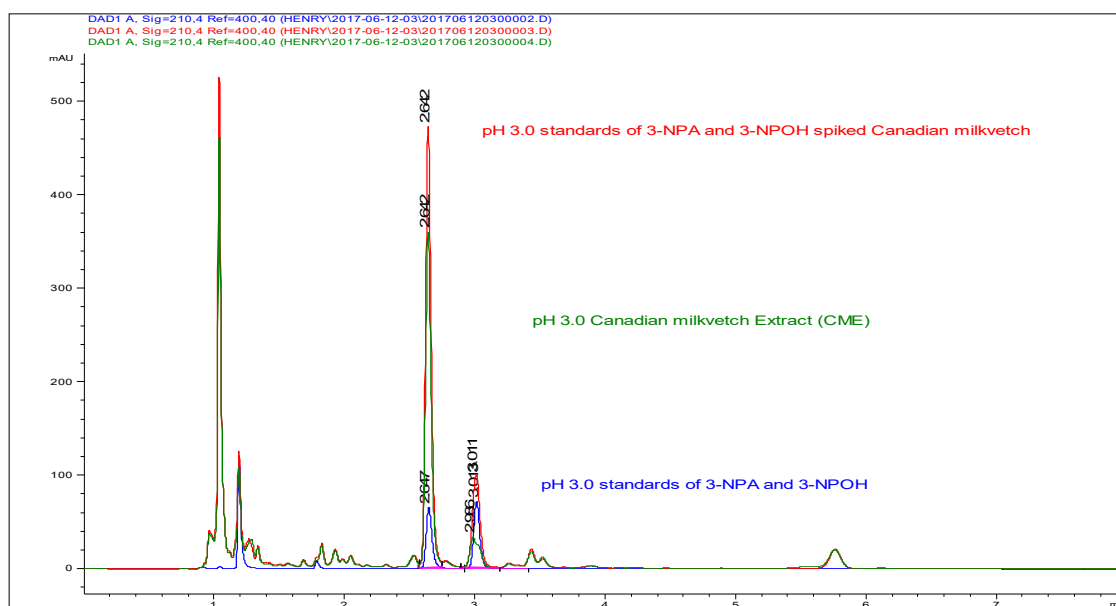

**Figure S3.** Overlaid HPLC chromatograms of mixture standards of 3-NPA and 3-NPOH at 10 ppm in water, Canadian milkvetch sample and spiked Canadian milkvetch samples, with pH 3.0 12.5 mM ammonium phosphate buffer as mobile phase on a Phenomenex Kinetex 2.6  $\mu$  F5 100Å column. All standard solution and Canadian milkvetch samples were recon at the corresponding pH mobile phase. 3-NPA and 3-NPOH was baseline separated.

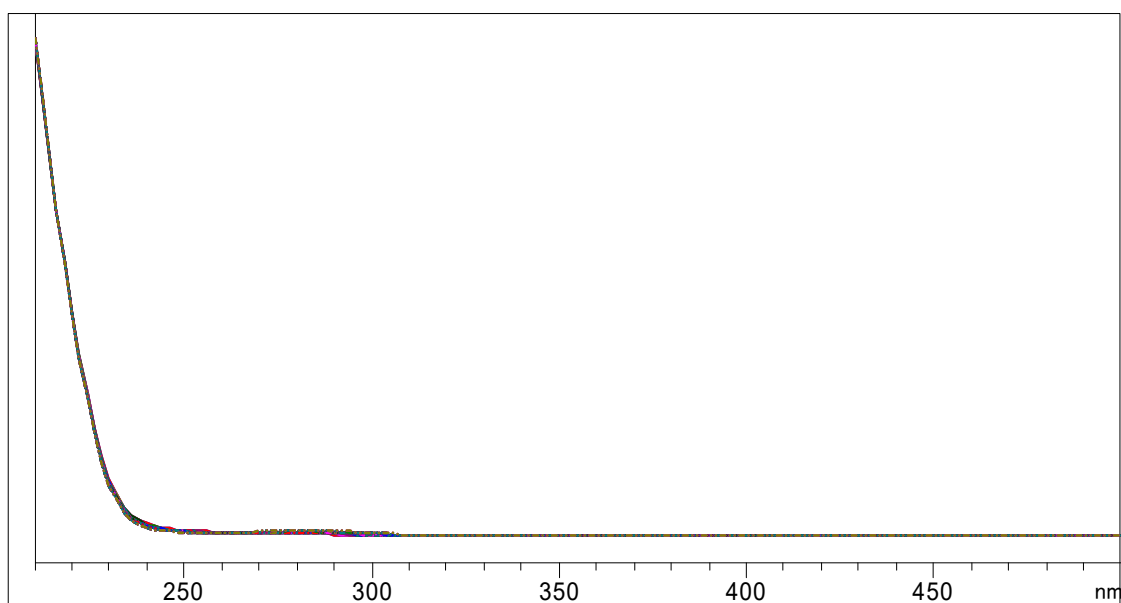

**Figure S4.** UV spectra of the peak of 3-NPA in Canadian milkvetch under the HPLC condition with pH 3.0 12.5 mM ammonium phosphate buffer as mobile phase on a Phenomenex Kinetex 2.6  $\mu$  F5 100Å column.

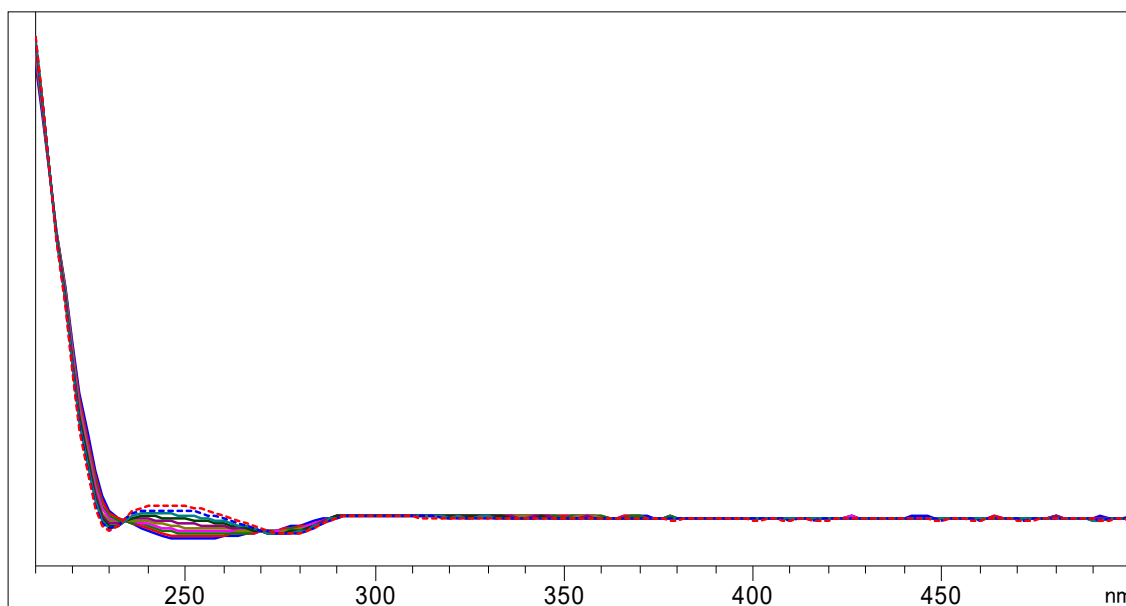

**Figure S5.** UV spectra of the peak of 3-NPOH in Canadian milkvetch under the HPLC condition with pH 3.0 12.5 mM ammonium phosphate buffer as mobile phase on a Phenomenex Kinetex 2.6  $\mu$  F5 100Å column.

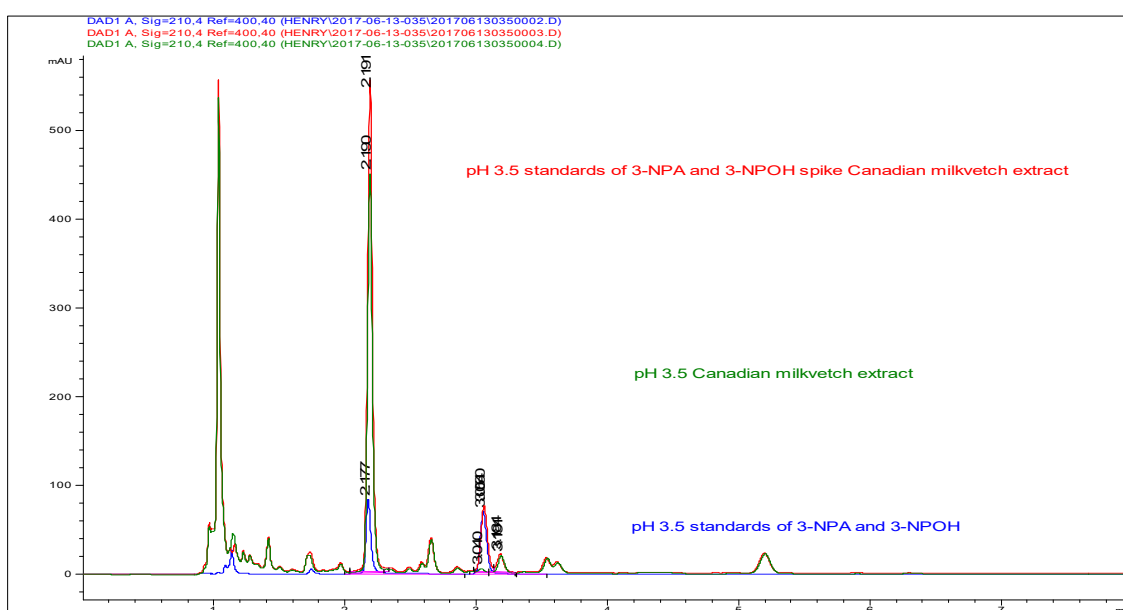

**Figure S6.** Overlaid HPLC chromatograms of mixture standards of 3-NPA and 3-NPOH at 10 ppm in water, Canadian milkvetch sample and spiked Canadian milkvetch samples, with pH 3.5 12.5 mM ammonium phosphate buffer as mobile phase on a Phenomenex Kinetex 2.6  $\mu$  F5 100Å column. All standard solution and Canadian milkvetch samples were recon at the corresponding pH mobile phase. 3-NPA and 3-NPOH was baseline separated.

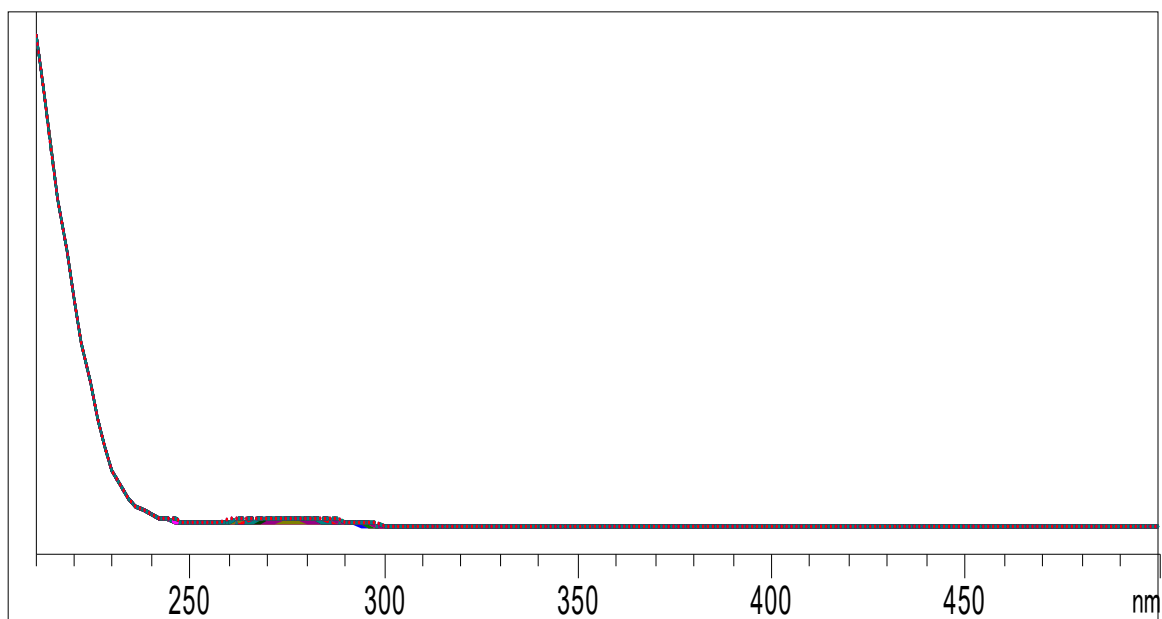

**Figure S7.** UV spectra of the peak of 3-NPA in Canadian milkvetch under the HPLC condition with pH 3.5 12.5 mM ammonium phosphate buffer as mobile phase on a Phenomenex Kinetex 2.6  $\mu$  F5 100Å column.

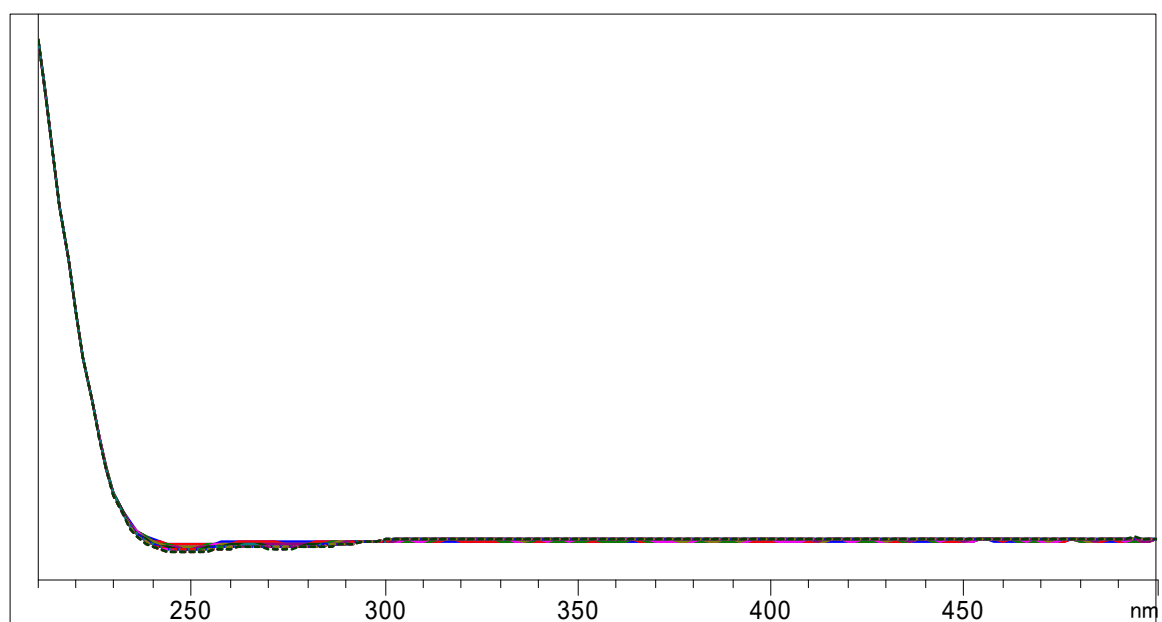

**Figure S8.** UV spectra of the peak of 3-NPOH in Canadian milkvetch under the HPLC condition with pH 3.5 12.5 mM ammonium phosphate buffer as mobile phase on a Phenomenex Kinetex 2.6  $\mu$  F5 100Å column.

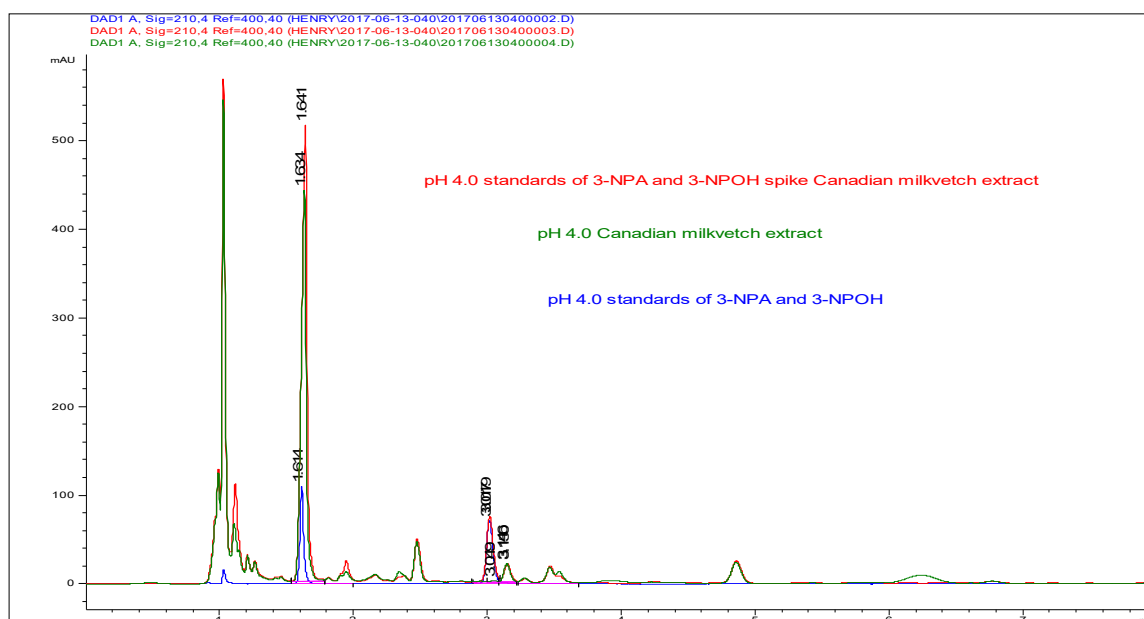

**Figure S9.** Overlaid HPLC chromatograms of mixture standards of 3-NPA and 3-NPOH at 10 ppm in water, Canadian milkvetch sample and spiked Canadian milkvetch samples, with pH 4.0 12.5 mM ammonium phosphate buffer as mobile phase on a Phenomenex Kinetex 2.6  $\mu$  F5 100Å column. All standard solution and Canadian milkvetch samples were recon at the corresponding pH mobile phase. 3-NPA and 3-NPOH was baseline separated.

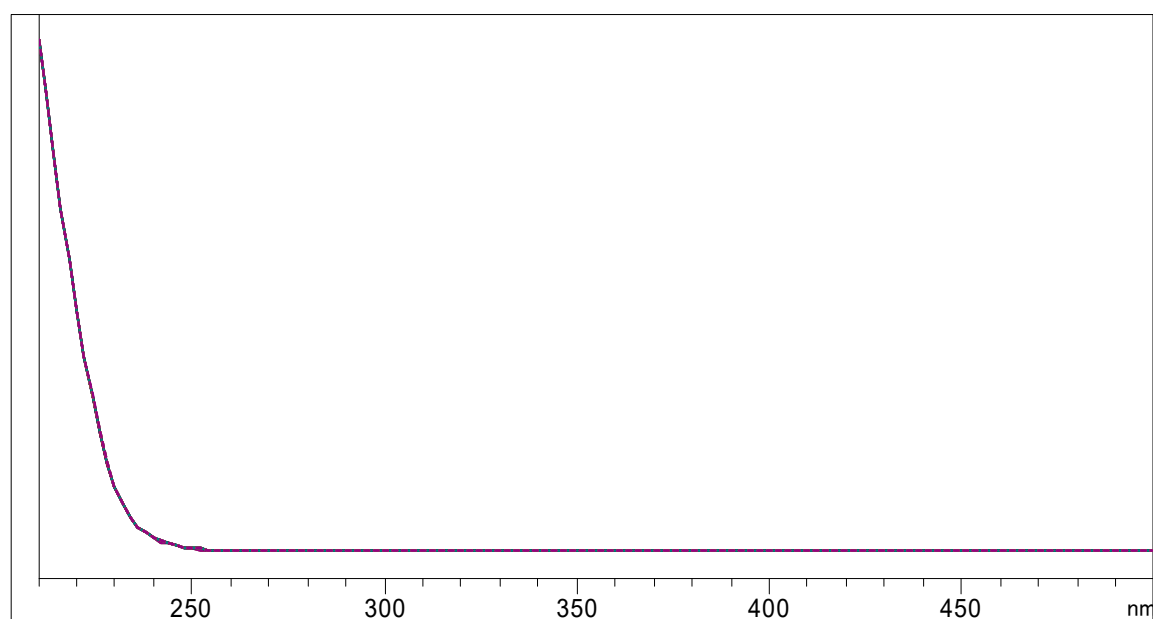

**Figure S10.** UV spectra of the peak of 3-NPA in Canadian milkvetch under the HPLC condition with pH 4.0 12.5 mM ammonium phosphate buffer as mobile phase on a Phenomenex Kinetex 2.6  $\mu$  F5 100Å column.

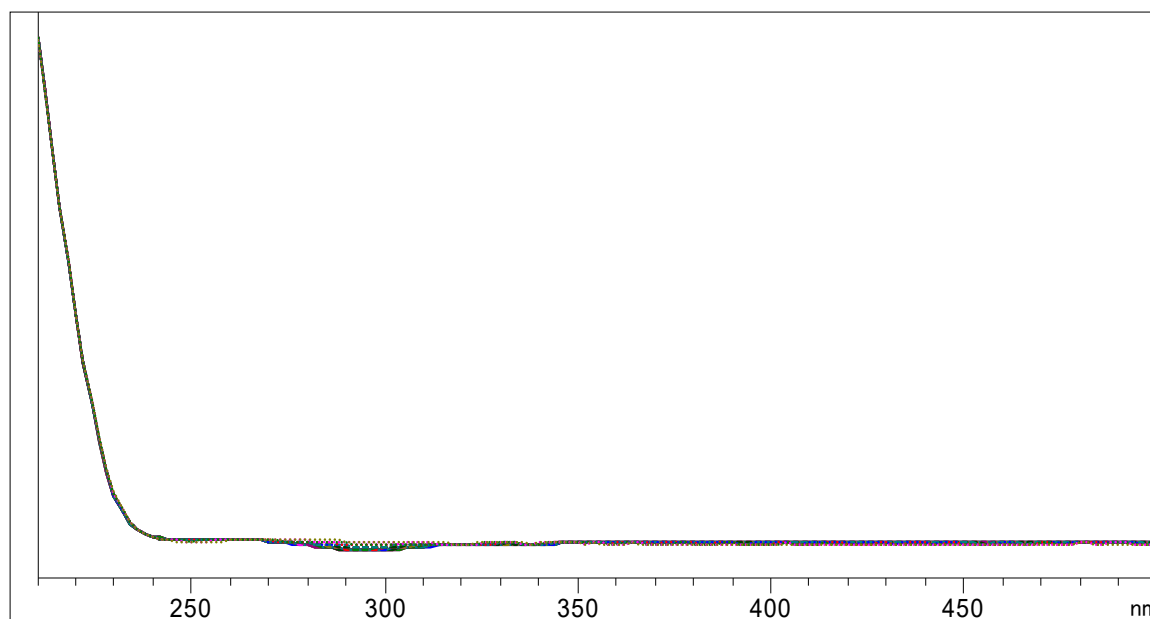

**Figure S11.** UV spectra of the peak of 3-NPOH in Canadian milkvetch under the HPLC condition with pH 4.0 12.5 mM ammonium phosphate buffer as mobile phase on a Phenomenex Kinetex 2.6  $\mu$  F5 100Å column.

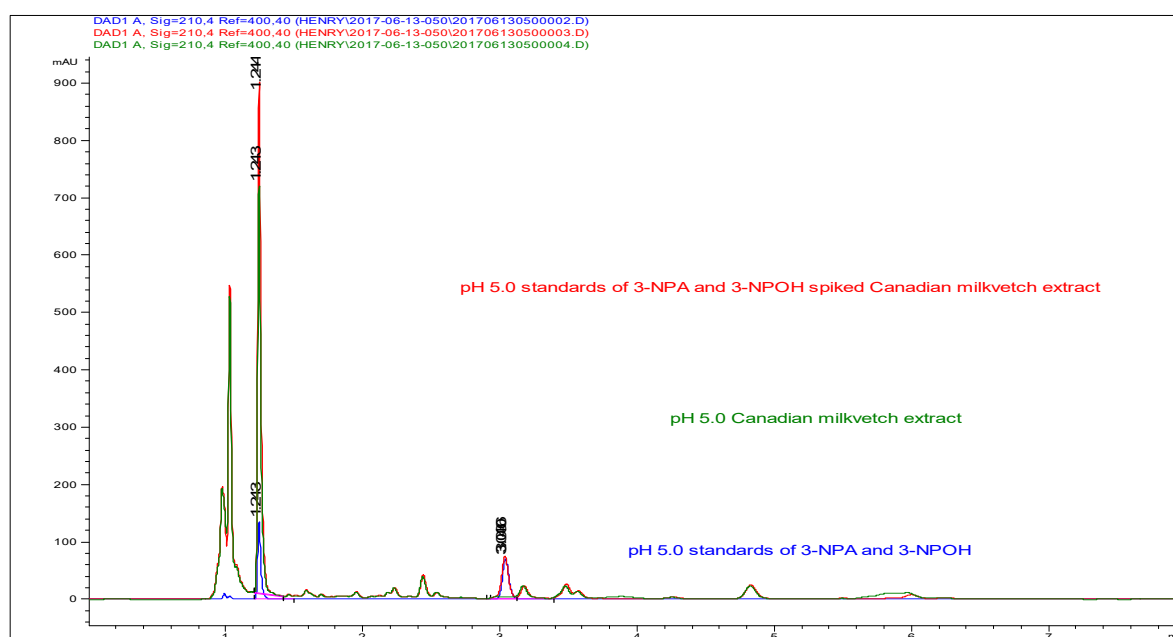

**Figure S12.** Overlaid HPLC chromatograms of mixture standards of 3-NPA and 3-NPOH at 10 ppm in water, Canadian milkvetch sample and spiked Canadian milkvetch samples, with pH 5.0 12.5 mM ammonium phosphate buffer as mobile phase on a Phenomenex Kinetex 2.6  $\mu$  F5 100Å column. All standard solution and Canadian milkvetch samples were recon at the corresponding pH mobile phase. 3-NPA and 3-NPOH was baseline separated.

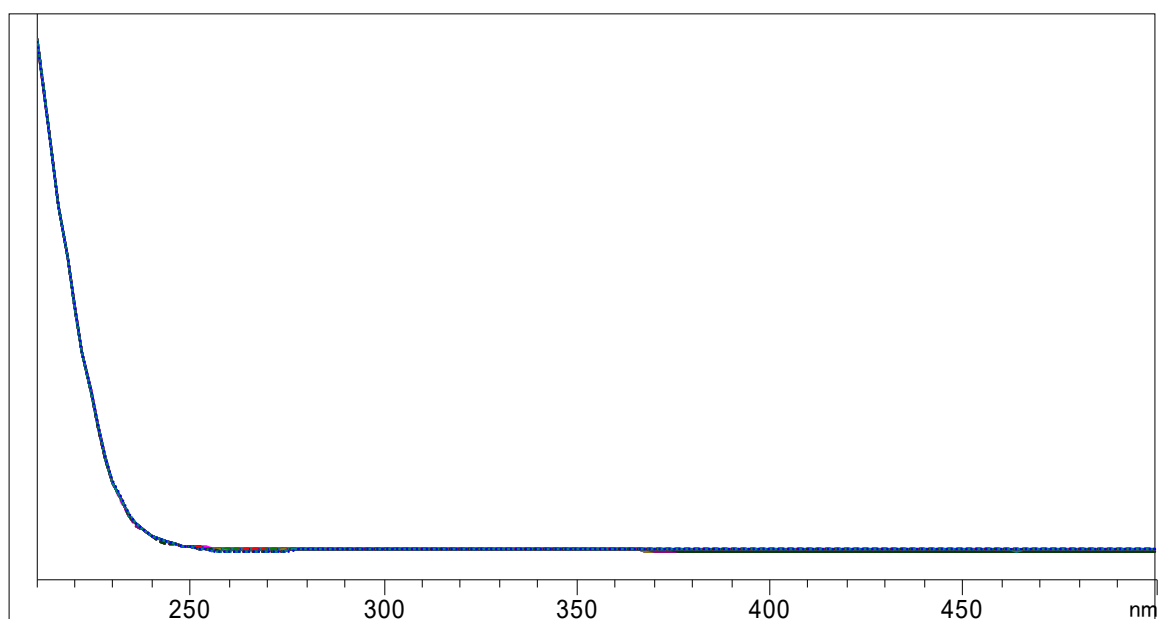

**Figure S13.** UV spectra of the peak of 3-NPA in Canadian milkvetch under the HPLC condition with pH 5.0 12.5 mM ammonium phosphate buffer as mobile phase on a Phenomenex Kinetex 2.6  $\mu$  F5 100Å column.

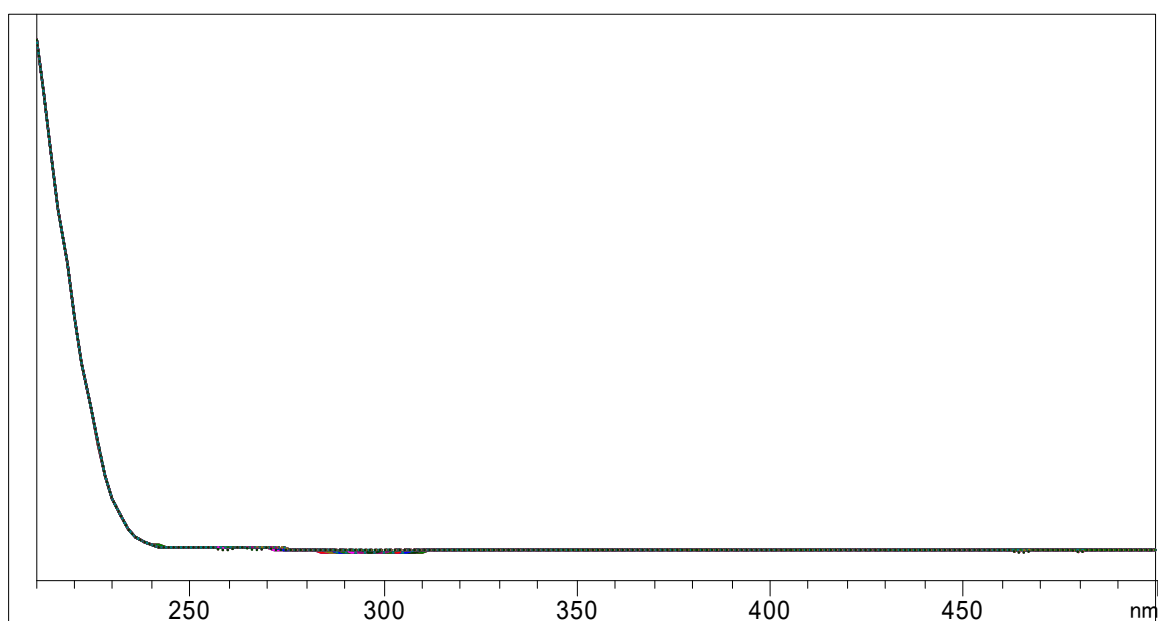

**Figure S14.** UV spectra of the peak of 3-NPOH in Canadian milkvetch under the HPLC condition with pH 5.0 12.5 mM ammonium phosphate buffer as mobile phase on a Phenomenex Kinetex 2.6  $\mu$  F5 100Å column.

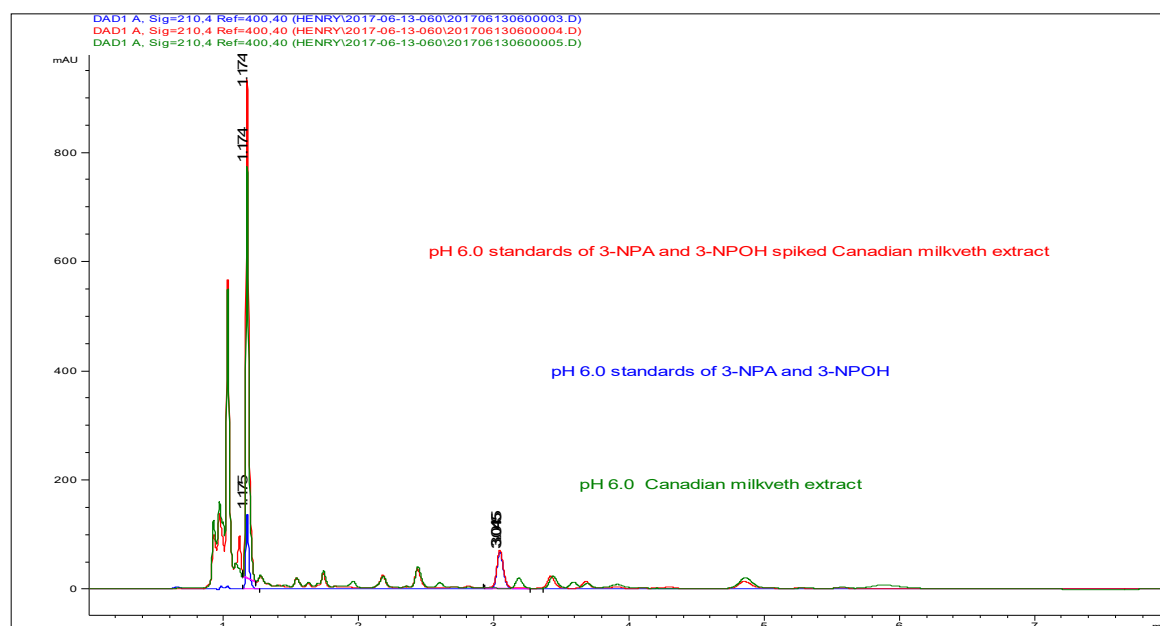

**Figure S15.** Overlaid HPLC chromatograms of mixture standards of 3-NPA and 3-NPOH at 10 ppm in water, Canadian milkvetch sample and spiked Canadian milkvetch samples, with pH 6.0 12.5 mM ammonium phosphate buffer as mobile phase on a Phenomenex Kinetex 2.6  $\mu$  F5 100Å column. All standard solution and Canadian milkvetch samples were recon at the corresponding pH mobile phase. 3-NPA and 3-NPOH was baseline separated.

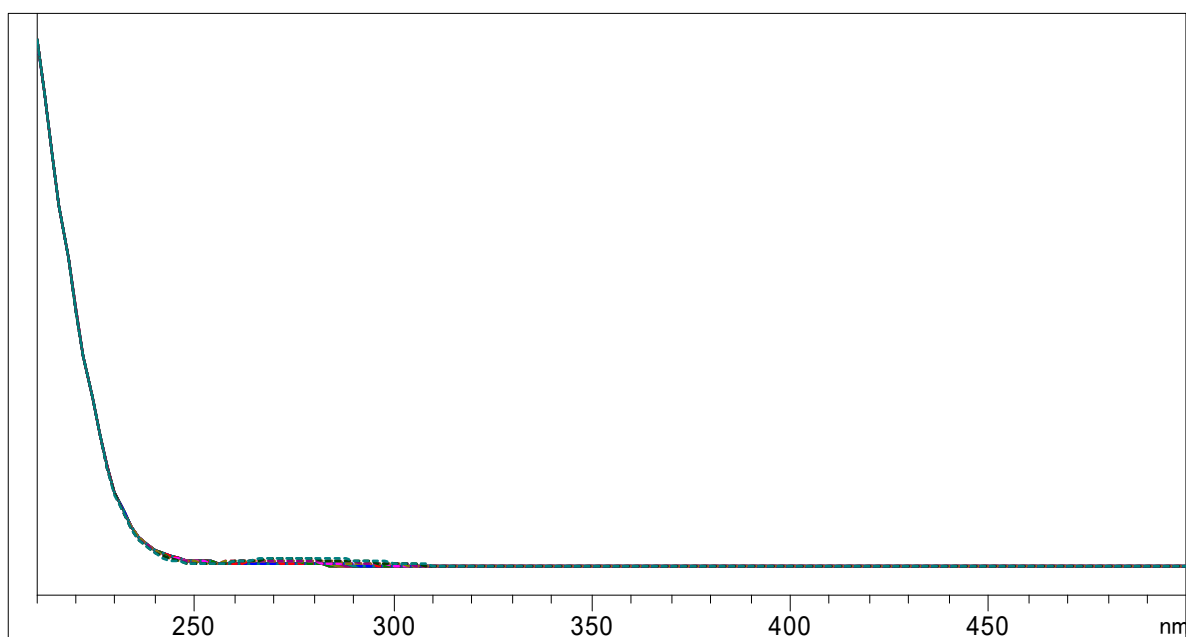

**Figure S16.** UV spectra of the peak of 3-NPA in Canadian milkvetch under the HPLC condition with pH 6.0 12.5 mM ammonium phosphate buffer as mobile phase on a Phenomenex Kinetex 2.6  $\mu$  F5 100Å column.

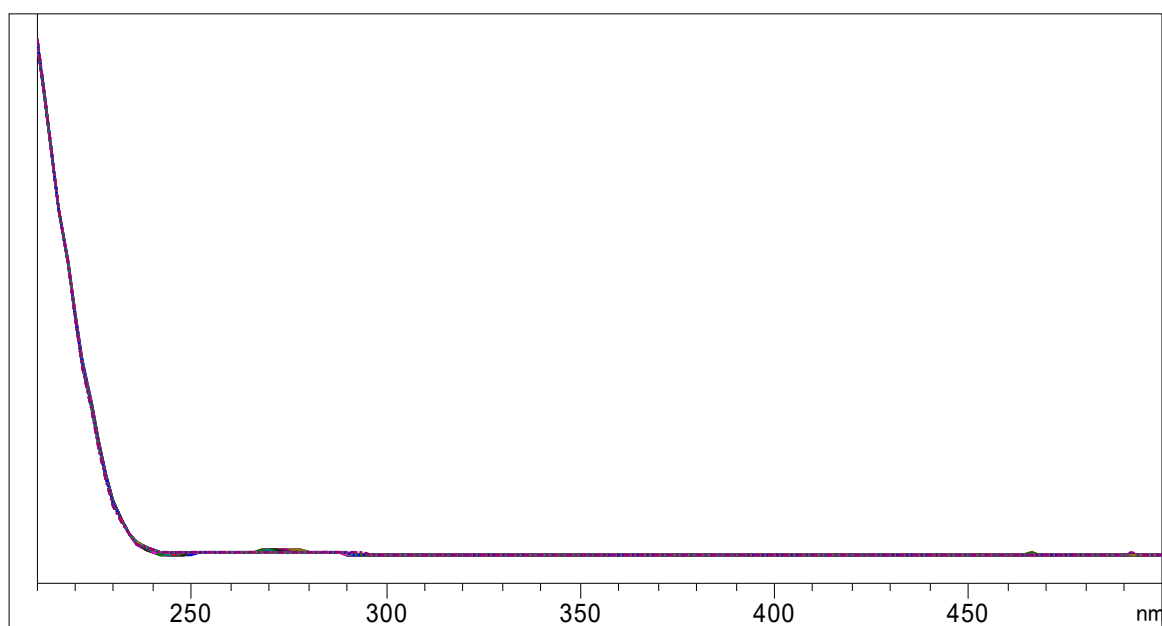

**Figure S17.** UV spectra of the peak of 3-NPOH in Canadian milkvetch under the HPLC condition with pH 6.0 12.5 mM ammonium phosphate buffer as mobile phase on a Phenomenex Kinetex 2.6  $\mu$  F5 100Å column.
